# Supplementary material
Source: Springer Nature journal article supplement (https://www.springermedizin.de/resource/supplementary/13256_2010_1600_MOESM3_ESM.pdf/9648028)

**A**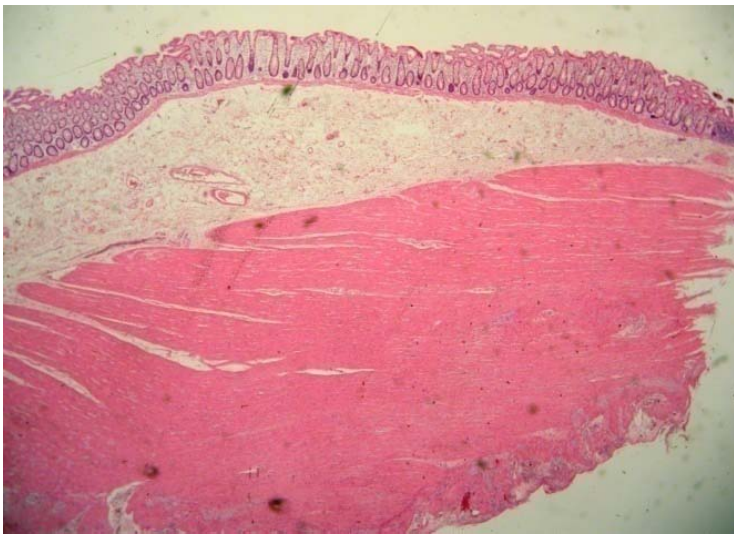**B**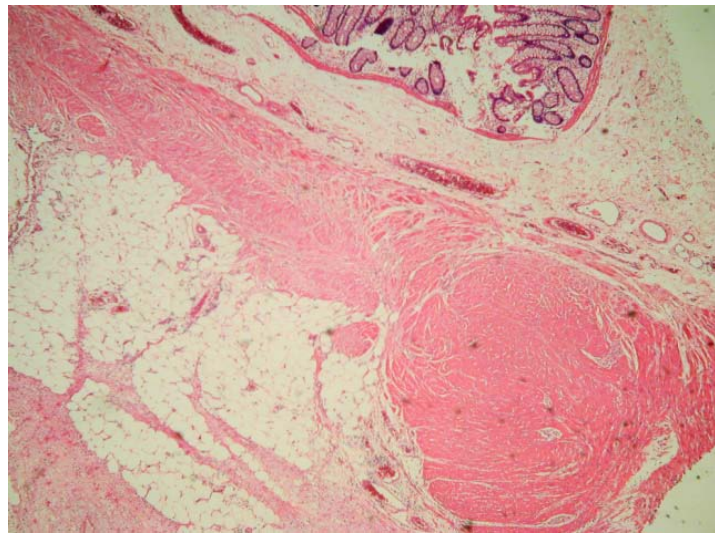**C**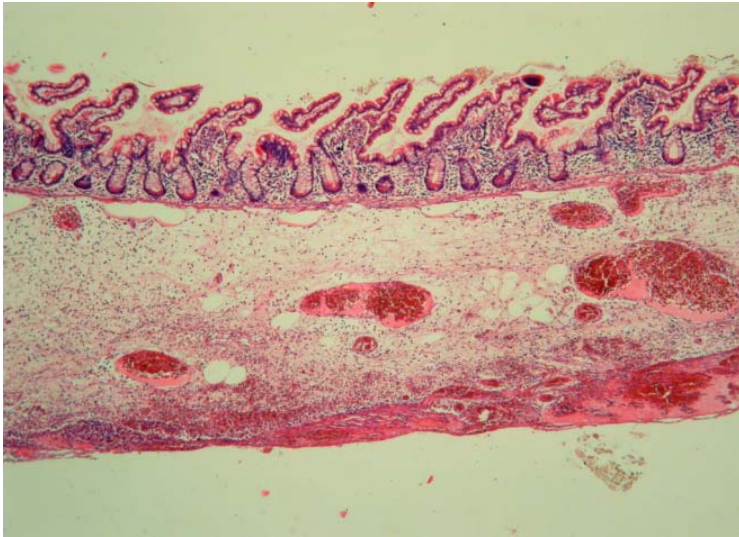**D**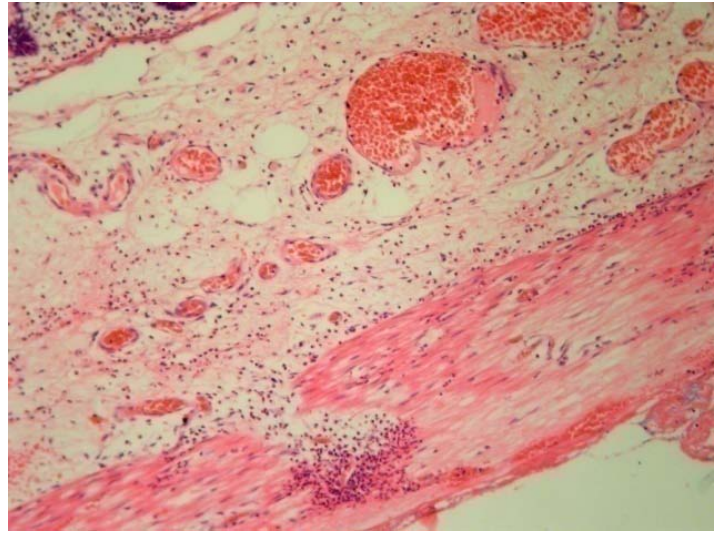

Supplement: MOESM3 [file 9648028]
